# Supplementary material for: Prognostic Impact of the Clinical Frailty Scale After Balloon Aortic Valvuloplasty
Source: PubMed Central journal article supplement — Circ Rep. 2020 Apr 9;2(6):322–9. doi: 10.1253/circrep.CR-19-0123 (PMC7925327; doi:10.1253/circrep.cr-19-0123), 2020-04-09
Supplement: circrep-2-322-s001.pdf [file circrep-2-322-s001.pdf]

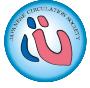

---

## **Prognostic Impact of the Clinical Frailty Scale After Balloon Aortic Valvuloplasty**

---

Tomoyo Hamana, MD; Masamichi Iwasaki, MD; Toshiro Shinke, MD; Tatsuya Kokawa, MD;  
Yuta Fukuishi, MD; Ryota Masaki, MD; Susumu Odajima, MD; Wataru Fujimoto, MD;  
Koji Kuroda, MD; Yutaka Hatani, MD; Takumi Inoue, MD; Hiroshi Okamoto, MD;  
Masanori Okuda, MD; Takatoshi Hayashi, MD; Ken-ichi Hirata, MD

**Supplementary Table 1.** Logistic regression analysis for 1-year mortality excluding hemodialysis patients

|                                  | <b>Univariable analysis</b> |           |         | <b>Multivariable analysis</b> |           |         |
|----------------------------------|-----------------------------|-----------|---------|-------------------------------|-----------|---------|
|                                  | Odds ratio                  | 95% CI    | P-value | Odds ratio                    | 95% CI    | P-value |
| <b>Age</b>                       | 1.06                        | 0.97-1.15 | 0.22    |                               |           |         |
| <b>Male</b>                      | 2.28                        | 0.97–5.37 | 0.06    | 3.43                          | 1.29-9.16 | 0.01    |
| <b>NYHA III/IV</b>               | 3.80                        | 1.53–9.42 | 0.004   | 2.78                          | 1.04-7.40 | 0.04    |
| <b>STS score</b>                 | 1.09                        | 1.03–1.16 | 0.006   |                               |           |         |
| <b>Clinical Frailty Scale</b>    | 1.55                        | 1.11–2.15 | 0.009   | 1.58                          | 1.10–2.29 | 0.01    |
| <b>Smoking</b>                   | 2.96                        | 1.00–8.71 | 0.05    |                               |           |         |
| <b>Albumin</b>                   | 0.34                        | 0.14–0.82 | 0.02    |                               |           |         |
| <b>eGFR</b>                      | 1.00                        | 0.98–1.02 | 0.81    |                               |           |         |
| <b>Brain natriuretic peptide</b> | 1.00                        | 1.00–1.00 | 0.02    |                               |           |         |
| <b>LVEF</b>                      | 0.97                        | 0.95–1.01 | 0.16    |                               |           |         |

NYHA, New York Heart Association; STS, Society of Thoracic Surgeons; eGFR, estimated Glomerular Filtration Rate; LVEF, Left Ventricular Ejection Fraction,

**Supplementary Table 2.** Serial echocardiographic parameters 1-, 3-, 6-, 12-month after BAV (n=63)

|                                                                        | <b>Pre BAV</b> | <b>1 month<br/>after BAV</b> | <b>3 months<br/>after BAV</b> | <b>6 months<br/>after BAV</b> | <b>12 months<br/>after BAV</b> |
|------------------------------------------------------------------------|----------------|------------------------------|-------------------------------|-------------------------------|--------------------------------|
| Aortic valve peak velocity, m/sec                                      | 3.98 ± 0.85    | 3.41 ± 0.77                  | 3.57 ± 0.79                   | 3.73 ± 0.78                   | 3.86 ± 0.82                    |
| Aortic valve peak gradient, mmHg                                       | 66.1 ± 27.1    | 48.9 ± 21.6                  | 53.4 ± 23.2                   | 58.1 ± 24.3                   | 62.1 ± 26.3                    |
| Aortic valve mean gradient, mmHg                                       | 37.9 ± 15.9    | 27.7 ± 13.1                  | 31.0 ± 14.1                   | 33.1 ± 14.8                   | 35.8 ± 16.0                    |
| Aortic valve area, cm <sup>2</sup>                                     | 0.66 ± 0.15    | 0.85 ± 0.17                  | 0.81 ± 0.18                   | 0.78 ± 0.17                   | 0.72 ± 0.15                    |
| Left ventricular outflow tract velocity time integral, cm <sup>2</sup> | 19.1 ± 6.3     | 19.8 ± 5.7                   | 21.0 ± 5.8                    | 21.2 ± 6.2                    | 21.0 ± 5.5                     |
| Stroke volume, mL                                                      | 59.0 ± 17.7    | 62.6 ± 16.4                  | 65.7 ± 15.6                   | 66.3 ± 16.5                   | 63.9 ± 15.8                    |
| Mitral regurgitation ≥ grade 2, n (%)                                  | 26 (41.3%)     | 19 (30.2%)                   | 14 (22.2%)                    | 16 (25.4%)                    | 22 (34.9%)                     |
| Aortic regurgitation ≥ grade 2, n (%)                                  | 6 (9.5%)       | 9 (14.3%)                    | 7 (11.1%)                     | 8 (12.7%)                     | 10 (15.9%)                     |

BAV; balloon aortic valvuloplasty
